# Supplementary material
Source: publisher figshare collection journal article supplement (https://diabetesjournals.figshare.com/ndownloader/files/34878030)
Supplement: Supplementary file 1 [file 34878030]

**Supplementary Figure S1. Semi-Structured Interview Key Topics**

- How are your visits with your 18-30 year old adults different than those with older adults?
- What are the most important influences on young adults’ self-management of diabetes?
  - Attitudes, feelings, and mindsets
  - People and social interactions
  - Environment and structural
- What are your visit interactions with young adult like?
  - What makes for a good visit with a young adult? Bad visit?
  - What challenges exist when interacting with young adults?
  - What strategies do you use when interacting with young adults?
  - What are your goals? Their goals?
- Describe the information you typically exchange
  - What information do they ask/share?
  - What information is most useful to share?
